# Systematic review and individual patient data meta-analysis on glucose- 6 – phosphate dehydrogenase activities measured by a semi-quantitative handheld Biosensor

Benedikt Ley<sup>1,2\*</sup>, Laura Rojas Vasquez<sup>3</sup>, Avyinaeesh Sitsabasan<sup>3</sup>, Bipin Adhikari<sup>4,5</sup>, Nabaraj Adhikari<sup>6</sup>, Mohammad Shafiul Alam<sup>7</sup>, Santasabuj Das<sup>8</sup>, Prakash Ghimire<sup>6</sup>, Marcus V. G. Lacerda<sup>9,10,11</sup>, Ric N. Price<sup>1,4,5</sup>, Komal Raj Rijal<sup>6</sup>, Lorenz von Seidlein<sup>4,5</sup>, Arunansu Talukdar<sup>12</sup>, Kamala Thriemer<sup>1</sup>, Ari Winasti Satyagraha<sup>13,14</sup>, Arkasha Sadhewa<sup>1</sup>, Megha Rajasekhar<sup>15</sup>, Robert J. Commons<sup>1,3</sup>

1. Global Health Division, Menzies School of Health Research and Charles Darwin University, Darwin, Australia
2. Division of Teaching, Menzies School of Health Research and Charles Darwin University, Darwin, Australia
3. General and Subspecialty Medicine, Grampians Health Ballarat, Ballarat, Victoria, Australia
4. Mahidol-Oxford Tropical Medicine Research Unit, Faculty of Tropical Medicine, Mahidol University, Bangkok, Thailand
5. Centre for Tropical Medicine and Global Health, Nuffield Department of Clinical Medicine, University of Oxford, Oxford, UK
6. Central Department of Microbiology, Tribhuvan University, Kathmandu, Nepal
7. International Centre for Diarrhoeal Disease Research, Bangladesh (icddr,b), Dhaka, Bangladesh
8. National Institute of Cholera and Enteric Diseases, Kolkata, India
9. Fundação de Medicina Tropical Dr Heitor Vieira Dourado, Manaus, Brazil
10. Instituto Leônidas e Maria Deane, Fiocruz, Manaus, Brazil
11. University of Texas Medical Branch, Galveston, TX, USA
12. Kolkata Medical College Hospital, India
13. Eijkman Research Center for Molecular Biology, National Research and Innovation Agency, Cibinong, Indonesia
14. EXEINS Health Initiative, Jakarta, Indonesia
15. Centre for Epidemiology and Biostatistics, Melbourne School of Population and Global Health, The University of Melbourne, Melbourne, VIC, Australia

\*Corresponding author: [benedikt.ley@menzies.edu.au](mailto:benedikt.ley@menzies.edu.au)

38 **Abstract**

39 Measurement of glucose-6-phosphate dehydrogenase (G6PD) activity guides hypnozoitocidal  
40 treatment of *P. vivax* malaria. The G6PD Standard (SDBiosensor, Republic of Korea) here referred to as  
41 “Biosensor” is a quantitative point-of-care diagnostic that measures G6PD activity in U/gHb . The  
42 manufacturer recommends cutoffs to define G6PD deficient ( $\leq 4.0$ U/gHb), intermediate (4.1-  
43  $\leq 6.0$ U/gHb) and normal ( $> 6.0$ U/gHb) individuals. The aim of this individual patient data (IPD) meta-  
44 analysis was to evaluate these cutoffs (CRD42023406595).

45 A systematic review identified studies reporting population-level G6PD activity measured by Biosensor,  
46 published between January 2017 and May 2023. IPD were collated and standardised. The adjusted  
47 male median (AMM) was defined as 100% activity and calculated across all studies (universal AMM)  
48 and separately for each setting. The proportion of participants classified as deficient or intermediate  
49 were compared using the manufacturer-recommended cutoffs and 30% and 70% of the universal  
50 AMM and setting-specific AMM. Associations between G6PD activity and blood sampling method,  
51 malaria status, and age were assessed.

52 Eleven studies with 9,724 participants from eight countries were included in this analysis. The universal  
53 AMM was 7.7U/gHb and the setting-specific AMMs ranged from 6.2U/gHb to 9.9U/gHb. When using  
54 the universal AMM, 4.2% of participants were classified as deficient and 11.9% as intermediate or  
55 deficient. The corresponding values were 3.9% and 10.8% for setting-specific cutoffs, and 7.2% and  
56 18.3% for manufacturer-recommended definitions for deficient and intermediates respectively. The  
57 manufacturer-recommended cutoff for deficient individuals fitted the distribution of G6PD activities  
58 better than definitions based on the percentage of AMM. There was no significant association between  
59 malaria status or blood sampling method and G6PD activity. Measured G6PD activity decreased in  
60 children 1 to 5 years and plateaued thereafter.

61 The manufacturer’s recommended cutoff is conservative but more reliable at categorising G6PD  
62 deficient individuals than those based on calculations of 30% activity using the AMM. The observed  
63 decrease in G6PD activity in children between 1 to 5 years of age warrants further investigation.

64

65

## 66 Background

67 Nearly 3.3 billion people are at risk of a *Plasmodium vivax* (*P. vivax*) infection [1-3]. In contrast to other  
68 malaria species *P. vivax* forms dormant liver stage hypnozoites that relapse weeks to months after a  
69 primary infection causing significant morbidity and mortality [4]. These hypnozoites represent a silent  
70 reservoir that complicates the elimination of *P. vivax* [5]. The 8-aminoquinolines, primaquine and  
71 tafenoquine, are the only licensed drugs that kill hypnozoites; although both drugs can cause severe  
72 haemolysis in patients with low glucose-6-phosphate dehydrogenase enzyme (G6PD) activity [6, 7].

73 G6PD is found in all eukaryotic cells and is essential in human red blood cells (RBCs) to maintain their  
74 redox potential [8, 9]. Enzyme activity is measured in international units (U), normalised by a  
75 haemoglobin (Hb) measurement (U/gHb) taken at the same time [10]. Since the phenotypic reference  
76 method, spectrophotometry, is poorly standardised, the output in U/gHb is converted to percent  
77 activity (%) based on the adjusted male median (AMM), to enable comparison across populations [11].  
78 To calculate the AMM, the median activity of all male individuals from the same population is  
79 calculated, all observations with values less than 10% of this median are then excluded and the median  
80 activity is recalculated from the remaining subset and defined as 100% activity [12]. More than 230  
81 clinically relevant genetic G6PD variants have been described to date, associated with reduced G6PD  
82 activities, collectively called G6PD deficiency [8, 13, 14].

83 The G6PD gene is located on the X-chromosome. Males have one copy of the gene and are hemizygous  
84 deficient or normal. Females have two copies and can be either homozygous deficient, homozygous  
85 normal, or heterozygous for the gene. Most hemizygous and homozygous deficient individuals have  
86 phenotypic G6PD activities below 30% and G6PD normal individuals have activities above 70% to 80%  
87 [15]. In comparison, heterozygous females have a wide range of G6PD activities from deficient to  
88 normal [8]. Accordingly, G6PD activities within a population show a bimodal distribution, with  
89 activities of the majority of individuals normally distributed around the 100% activity mark and a  
90 second smaller peak representing hemizygous and homozygous deficient individuals (Fig 1) [16].

91

92 **Fig 1: G6PD activities in samples collected from participants in Bangladesh during a cross-sectional**  
93 **survey measured by spectrophotometry**

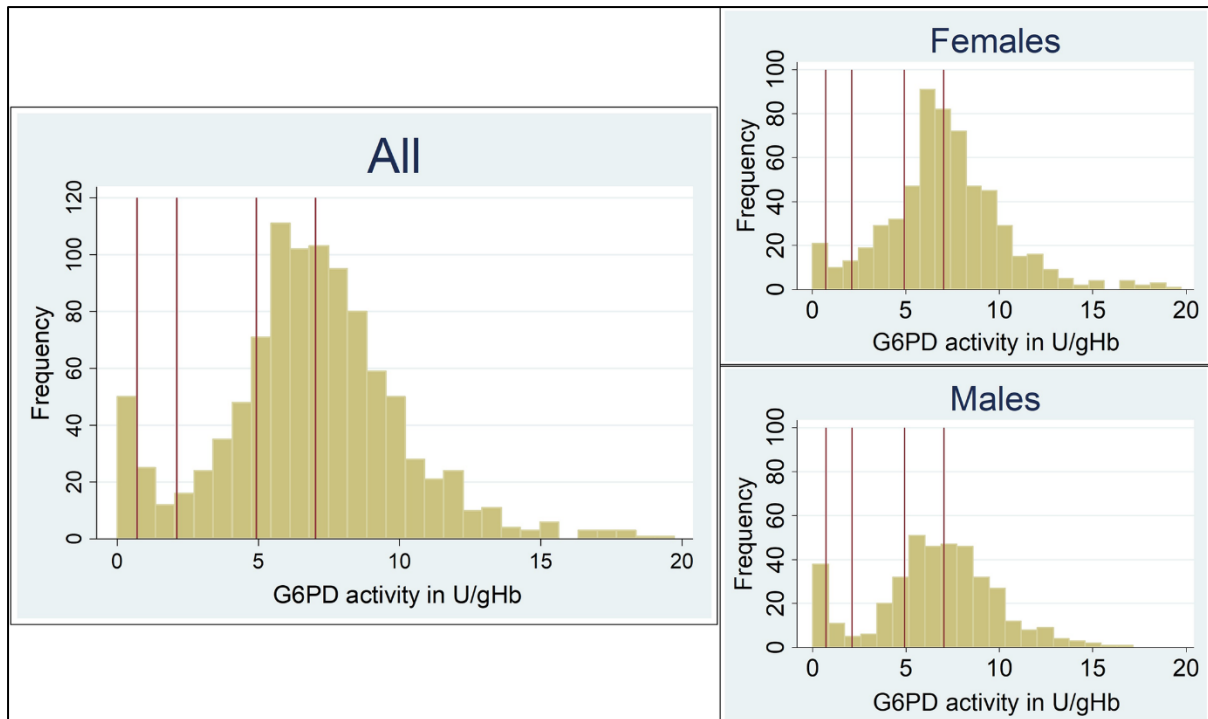

94

95 *Vertical lines from left to right indicate 10%, 30% 70% and 100% G6PD activity [16]*

96

97 The World Health Organization (WHO) recommends testing patients for G6PD deficiency prior to  
98 treatment with daily primaquine regimens to identify patients with reduced activity and tailor their  
99 treatment accordingly [17]. Patients with G6PD activity <30% should not receive 7- or 14-day  
100 primaquine regimens. Tafenoquine is only recommended for patients with  $\geq 70\%$  G6PD activity [18,  
101 19]. In 2022 the WHO revised their classification of G6PD variants, recommending that any variant  
102 with a median activity <45% (Class B) by spectrophotometry should be considered clinically significant  
103 [14, 20, 21]. Although spectrophotometry is the reference method to measure G6PD activity, it is  
104 unsuitable for point of care testing [22]. To date, the only point of care test that can reliably  
105 discriminate activities between 30% and 70% is the handheld semi-quantitative Biosensor from SD  
106 Biosensor (STANDARD G6PD, ROK; Biosensor) [22-25]. The Biosensor generates G6PD (in U/gHb) and  
107 haemoglobin (in g/dL) readings from 10  $\mu$ l of capillary or venous blood within two minutes. The  
108 manufacturer recommends thresholds of 4.0 U/gHb and 6.0 U/gHb to discriminate deficient and  
109 intermediate activities respectively [26]. Alignment of these cutoffs with local AMM-derived 30% and  
110 70% cutoffs have varied considerably [27]. This individual patient data pooled analysis aimed to assess  
111 whether the manufacturer-recommended cutoffs for the Biosensor are universally applicable.

112

## 113 **Methods**

### 114 ***Search strategy and selection criteria***

115 A systematic review of Medline, Web of Science, Cochrane Central, Scopus, Clinicaltrials.gov and the  
116 WHO International clinical trials registry platform was undertaken to identify studies that measured  
117 population-based G6PD activity using the G6PD Standard point of care test (Biosensor) manufactured  
118 by SD Biosensor (Republic of Korea) between January 1, 2017, and May 17, 2023, in any language.  
119 Search terms used were ((G6PD) OR (G6PD deficiency) OR (Glucose-6-phosphate dehydrogenase) OR  
120 (Glucose-6-phosphate dehydrogenase deficiency)) AND ((G6PD Standard) OR (SDBiosensor) OR (SD  
121 Biosensor) OR (Standard G6PD) OR tafenoquine). Studies were included if they reported activities of  
122 at least 36 randomly selected male individuals older than 1 year from a population expected to have  
123 a G6PD distribution consistent with the local population. Four reviewers undertook the systematic  
124 review (AS, BL, LRV and RJC) with each article screened by two reviewers and discrepancies resolved  
125 by discussion. The protocol was registered with PROSPERO CRD42023406595.  
126 Investigators of studies eligible for inclusion were invited to contribute individual patient data in  
127 addition to any data from eligible but unpublished studies. Data collected included age, sex, malaria  
128 status, G6PD activity (in U/gHb) and haemoglobin (in g/dL) measured by Biosensor, date of G6PD  
129 measurement, methodology of blood collection (capillary versus venous), pregnancy status, date of  
130 last malaria episode, and history of giving birth, blood loss or major surgery in the previous 6 months.  
131 Individual patient data were excluded if missing age, sex, G6PD activity, or haemoglobin, or if  
132 haemoglobin was <7 g/dL on the Biosensor measurement, as recommended by the manufacturer.  
133 Data were obtained according to ethical approvals from the original study. Our analysis did not require  
134 additional ethical approval as the original data approved by ethical review boards were anonymised  
135 and unable to be linked to individuals.

136

### 137 **Definitions**

138 Each combination of country and study group was defined as a 'setting'. The blood sampling technique  
139 was categorised as venous or capillary. The AMM was defined as 100% activity and calculated from  
140 male participants above one year of age who tested negative for malaria by microscopy or rapid  
141 diagnostic test (RDT) and after removal of participants with the lowest 10% of reported G6PD activities  
142 [12]. The AMM was calculated for the entire data set (universal AMM) and separately for each setting  
143 (setting-specific AMM). G6PD deficient and intermediate status of all included participants were  
144 categorised repeatedly: i) as measured activity of less than 30% and 70% of the universal AMM, ii) as  
145 measured activity of less than 30% and 70% of the setting-specific AMM, and iii) when applying the  
146 manufacturer recommended cut-off of 4.0 U/gHb and 6.0 U/gHb, respectively.

147

### 148 **Statistical Analysis**

149 All observations were categorised three times based on the different definitions of deficient and  
150 intermediate activities and proportions of deficient and intermediate individuals were compared. The  
151 distribution of G6PD activities was plotted by sex for the overall population and by setting. The  
152 association between blood sampling method (capillary or venous) and G6PD activity was assessed in  
153 studies that sampled using both capillary and venous methods. The relationship was analysed using  
154 multivariable linear regression adjusting for age, sex, baseline Hb, and malaria status with robust  
155 errors and clustering by setting. Using a similar multivariable linear regression model restricted to  
156 studies which included participants both with or without malaria, the association between malaria  
157 presence and G6PD activity was investigated. The relationship between age and G6PD activity was  
158 also investigated in a similar model. Due to a non-linear relationship between age and G6PD activity,  
159 a post hoc analysis was undertaken with a generalised estimating equations model to visualise the  
160 relationship between G6PD activity and age with fractional polynomial terms fitted for age,  
161 adjustment for age, sex, baseline Hb, and blood sampling method and clustering by setting. This  
162 relationship was explored separately in all participants, in males and females. Separate sensitivity  
163 analyses were undertaken restricted to males with i) a haemoglobin >10 g/dL and ii) excluding those  
164 with an activity  $\leq 4.0$  U/g Hb (presumed deficient).

165 The within-study risk of bias assessment was performed using the QUADAS-2 tool [28]. Analyses were  
166 undertaken in Stata (version 17).

167

## 168 **Results**

169 A total of 322 studies were found in the databases, published between January 1, 2017, and May 17,  
170 2023, of which 300 were excluded after screening titles and abstracts (Figure 2). A further 18 studies  
171 were excluded because G6PD activity was not measured by Biosensor (n=12), participants were not  
172 selected randomly from the whole population (n=4) or the trial was ongoing (n=2). A total of four  
173 studies met the eligibility criteria [29-32] and data were available and shared by investigators. Data  
174 on sex were not recorded consistently across G6PD categories for one study leading to its exclusion.  
175 Data from eight studies unpublished as of May 17, 2023, were also available, providing a total of 11  
176 studies on 10,905 participants [33, 34]. Data from 1,181 participants were excluded due to missing  
177 variables and haemoglobin measurements <7 g/dL, resulting in 9,724 participants from 11 studies  
178 included in the analysis .

179 Data were included from 8 countries: Bangladesh, Brazil, Cambodia, Ethiopia, India, Indonesia, Nepal,  
180 and the United States of America. The median age was 30.0 years (interquartile range (IQR) 21.0-43.0),  
181 of whom 4,237 (43.6%) were female and 8,938 (91.9%) were sampled using capillary sampling  
182 methods. Malaria was recorded in 2,282 (23.5%) participants. No consistent data were available on

183 pregnancy, previous malaria episodes, recent surgery, recent blood loss, or recent blood transfusions.  
184 There were 14 unique settings (country and study categories), of which 2 (14%) had unclear or possible  
185 risk of bias (Table S1 - QUADAS).  
186 The distribution of G6PD activities in male participants showed two peaks consistent with presumed  
187 G6PD deficient and G6PD normal populations (Figure 3). Visually, the nadir in the overlapping region  
188 between these peaks occurred at ~3.5 U/gHb. The universal AMM, derived from 3,959 males without  
189 parasitaemia, was 7.7 U/gHb and from this the 30% cutoff was determined to be 2.3 U/gHb and the  
190 70% cutoff was determined to be 5.4 U/gHb (Table 2 and Figure 3). The AMM calculated for each  
191 setting varied substantially from 6.2 U/gHb in one study from Nepal to 9.9 U/gHb in a study in  
192 Bangladesh [33, 34]. The setting-specific cutoffs for 30% G6PD activity ranged from 1.9 U/g Hb to 3.0  
193 U/g Hb and the corresponding setting-specific 70% cutoffs varied from 4.3 U/gHb to 6.9 U/gHb (Table  
194 2).  
195 Using the manufacturer's cutoff of 4.0 U/gHb, 7.2% (699) of all participants in this analysis were  
196 classified as deficient (72.8% (509) were males), but this decreased to 4.2% (411) when the universal  
197 30% cutoff of 2.3 U/gHb was applied (Figure 3), and 3.9% (301) when the setting-specific 30% cutoffs  
198 were applied (Table 2 and Figure 4). Using the manufacturer's cutoff of 6.0 U/gHb, 18.3% (1,777) of  
199 participants were classified as having intermediate or deficient G6PD activity (<70%) and this  
200 decreased to 11.9% (1,156) when the universal cutoff was applied and 10.8% (830) when the setting-  
201 specific cutoffs were applied. Of the 1,078 patients with intermediate activity (>4.0-6.0 U/gHb) using  
202 the manufacturer's cutoffs, 60.1% (648) were male. The distribution of G6PD activities varied  
203 substantially between settings (Figure 4 and Tables 1-2).  
204 Two settings sampled more than 10 individuals whose G6PD activity was measured from both capillary  
205 and venous samples [33, 34]. After adjusting for age, sex, baseline Hb, and malaria status with  
206 clustering by setting, there was no difference in mean G6PD activity between capillary or venous  
207 sampling (mean difference: 0.28 U/gHb, 95% CI -1.27, 1.83).  
208 Data were available from 6 settings on 5,064 participants with and without malaria [33, 34]. After  
209 adjusting for confounders, there was no difference in mean G6PD activity between participants with  
210 or without malaria (-0.64 U/gHb, 95% CI -1.91, 0.64). Similarly, removing parasitaemic participants did  
211 not change the percentages of participants classified as having <30% or <70% G6PD activity  
212 substantially (Table S2).  
213 There was a non-linear association between age and G6PD activity and age and haemoglobin (Figure  
214 S1). In an exploratory analysis, measured G6PD activity decreased sharply with increasing age in  
215 children aged 1 to 5 years and plateaued thereafter, after adjusting for sex, baseline haemoglobin and  
216 blood sampling method with clustering by setting (Figure 5). This relationship was apparent in

217 subgroups of male and female individuals. In sensitivity analyses, the age differences remained  
218 apparent when restricted to males with a haemoglobin >10 g/dL and males with G6PD activity >4.0  
219 U/g Hb.

220

## 221 **Discussion**

222 A reliable and accurate point-of-care diagnostic for G6PD activity is an important tool for the safe  
223 prescription of 8-aminoquinoline antimalarial drugs in vivax-endemic countries. Our individual patient  
224 data pooled meta-analysis of over 9,700 participants from 11 studies and eight countries  
225 demonstrates substantial heterogeneity in the definition of 100% activity between settings. The  
226 current manufacturer-recommended cutoffs to define deficient and intermediate G6PD activity are  
227 conservative, placing a higher proportion of individuals in the intermediate or deficient category than  
228 when applying locally calculated cutoffs. Definitions for 100% activity based on setting-specific AMMs  
229 ranged from 6.2 U/gHb to 9.9 U/gHb between settings and this was reflected by significant variation  
230 in the respective 30% and 70% cutoffs. A previous study demonstrated that, under ideal laboratory  
231 conditions, with trained laboratory staff, the Biosensor performed comparably across different  
232 settings [35]. The differences observed in our analysis could therefore be related to differences in user  
233 proficiency or inherent differences between sites.

234 The universal definition of 100% activity in our pooled sample was 7.7 U/gHb according to the  
235 Biosensor, and the corresponding cutoff for 30% activity (2.3 U/gHb) that was derived from this AMM  
236 appeared to exclude a substantial proportion of presumed deficient males from the G6PD deficient  
237 group based on the distribution of G6PD activities in the male population (Figure 3 and Figure 4). In  
238 comparison, across all settings most male participants at the lower end of the G6PD activity  
239 distributions were included in the deficient group using the manufacturer-recommended cutoff of 4.0  
240 U/gHb (Figure 3 and Figure 4).

241 A cutoff at 30% activity defined based on spectrophotometry measurements captures the majority of  
242 male deficient patients [15]. In contrast, the Biosensor manufacturer-recommended cutoff of 4.0  
243 U/gHb corresponds to 52% activity as determined by the universal AMM. This difference suggests  
244 there is an imperfect correlation between G6PD activity measured by spectrophotometry and G6PD  
245 activity measured by Biosensor, such that the correlation is not 1:1. Most qualitative G6PD diagnostics  
246 distinguish deficient and normal individuals at the 30% activity level, developed based on results from  
247 spectrophotometry, and have effectively guided radical cure in males over several decades [36].  
248 Additional investigation of the relationship between Biosensor and spectrophotometric G6PD activity  
249 is warranted including assessment of haemolytic risks at various cutoffs to identify whether



250 adjustments to the manufacturer-recommended cutoff of 4.0 U/gHb to identify G6PD deficient  
251 individuals is needed.

252 The manufacturer recommended cutoff of 6.0 U/gHb corresponds to 78% activity using the universal  
253 AMM and thus places a higher proportion of participants in the category of intermediate activity.  
254 Treatment with high dose primaquine radical cure (1 mg/kg/day for 7 days) potentially has a greater  
255 risk of haemolysis in heterozygous females with intermediate activity [37, 38]. A recent clinical trial in  
256 Bangladesh, Ethiopia and Indonesia provided this high dose primaquine radical cure regimen to  
257 individuals with  $\geq 70\%$  activity based on the local AMM. At one site the corresponding cut-off was 5  
258 U/gHb, well below the manufacturer recommended 6.0 U/gHb cutoff for intermediate patients, with  
259 no treatment-related serious adverse events observed, and no patients developing severe anaemia  
260 (haemoglobin  $< 5$  g/dL) [39]. This study and previous studies suggest that patients with activities below  
261 6.0 U/gHb may tolerate high dose primaquine and the optimal cutoff to determine heterozygous  
262 female patients at risk of severe haemolysis requires further investigation [40].

263 Neither the source of blood sampling nor malaria status impacted phenotypic G6PD activity, but G6PD  
264 activity did vary with age. Measured G6PD activity decreased from  $\sim 11$  U/gHb to  $\sim 8$  U/gHb as age  
265 increased from one to five years before plateauing thereafter. A decrease in G6PD activity over the  
266 first 6 to 12 months of life had been described previously, however, to our knowledge, this has not  
267 been observed in older children [41, 42]. This observation warrants further investigation since it may  
268 relate to either a true variation in enzyme activity, other influential parameters such as haemoglobin  
269 varying over age, or specific features associated with point of care testing with the Biosensor. If  
270 confirmed, this will have important clinical relevance, including the potential for reduced susceptibility  
271 to drug-induced haemolysis in young children and hence increased confidence in administering the  
272 radical cure in children [43]. If this finding is specific for the Biosensor, it may require an age-based  
273 adjustment in results in young children to ensure children are not falsely classified as G6PD normal.

274 Our study has several limitations. The proportion of individuals with G6PD deficiency is known to vary  
275 substantially between and within countries [44]. Although data from nearly 10,000 individuals from  
276 eight countries were included, the study population is not necessarily representative of all populations  
277 in vivax endemic regions. Furthermore, setting-specific cutoffs may have been influenced by  
278 differences in participant age as well as sample handling, though G6PD activity remains stable for at  
279 least seven days if samples are stored between  $4^{\circ}\text{C}$  to  $8^{\circ}\text{C}$  [45, 46]. Data were not available on  
280 pregnancy, recent surgery, recent blood loss, or recent blood transfusion, preventing any adjustment  
281 for their effect on G6PD activity [8, 47, 48]. The pooled G6PD activity measurements did not have a  
282 paired spectrophotometric reference measurement, preventing assessment of systematic bias in  
283 specific settings. Due to the absence of a reference method, it was also not possible to compare the

284 performance of universal and manufacturer recommended cutoffs against a gold-standard method,  
285 instead we had to rely on visual inspection of activity distributions.

286 In the absence of clinical data on haemolysis it was not possible to correlate Biosensor G6PD activity  
287 with haemolytic risks, preventing an understanding of how different cutoffs would perform in a clinical  
288 population undergoing 8-aminoquinoline therapy.

289 In conclusion, there was a substantial difference between the manufacturer-recommended cutoffs for  
290 G6PD deficient and intermediate individuals and those derived using the current dataset based on  
291 30% and 70% thresholds with the G6PD Standard definitions being more conservative. Further clinical  
292 studies are needed to determine the relationship between spectrophotometry and Biosensor G6PD  
293 activity measurements and the cutoffs that best predict the risk of drug-induced haemolysis.

294

295

### 296 **Acknowledgements**

297 We thank all participants and staff who were involved in these clinical trials at all the sites. This  
298 research has been supported by the Australian Government through the Partnerships for a Healthy  
299 Region (PHR) initiative. The views expressed in this publication are the author's alone and are not  
300 necessarily the views of the Australian Government.

301

302

### 303 **Funding**

304 This work was supported by an NHMRC Ideas Grant (2028979), the content of this article does not  
305 necessarily reflect the views of the NHMRC. RJC is supported by an Australian National Health and  
306 Medical Research Council (NHMRC) Investigator Grants (1194702).

307

### 308 **Data sharing**

309 Study data can be obtained by request to the corresponding authors of the included studies.

310  
311  
312  
313  
314  
315  
316  
317  
318  
319  
320  
321  
322  
323  
324  
325  
326  
327  
328  
329  
330  
331  
332  
333  
334  
335  
336  
337  
338  
339  
340  
341  
342  
343  
344  
345  
346  
347  
348  
349  
350  
351  
352  
353  
354  
355  
356  
357  
358  
359  
360

## REFERENCES

1. Battle KE, Lucas TCD, Nguyen M, Howes RE, Nandi AK, Twohig KA, et al. Mapping the global endemicity and clinical burden of *Plasmodium vivax*, 2000-17: a spatial and temporal modelling study. *Lancet*. 2019. Epub 2019/06/24. doi: 10.1016/S0140-6736(19)31096-7. PubMed PMID: 31229233.
2. Price RN, Commons RJ, Battle KE, Thriemer K, Mendis K. *Plasmodium vivax* in the Era of the Shrinking *P. falciparum* Map. *Trends Parasitol*. 2020;36(6):560-70. doi: 10.1016/j.pt.2020.03.009. PubMed PMID: 32407682; PubMed Central PMCID: PMC7297627.
3. Battle KE, Lucas TCD, Nguyen M, Howes RE, Nandi AK, Twohig KA, et al. Mapping the global endemicity and clinical burden of *Plasmodium vivax*, 2000-17: a spatial and temporal modelling study. *Lancet*. 2019;394(10195):332-43. doi: 10.1016/S0140-6736(19)31096-7. PubMed PMID: 31229233; PubMed Central PMCID: PMC6675736.
4. Dini S, Douglas NM, Poespoprodjo JR, Kenangalem E, Sugiarto P, Plumb ID, et al. The risk of morbidity and mortality following recurrent malaria in Papua, Indonesia: a retrospective cohort study. *BMC Med*. 2020;18(1):28. doi: 10.1186/s12916-020-1497-0. PubMed PMID: 32075649; PubMed Central PMCID: PMC7031957.
5. Kondrashin AV, Morozova LF, Stepanova EV, Turbabina NA, Maksimova MS, Morozov EN. On the epidemiology of *Plasmodium vivax* malaria: past and present with special reference to the former USSR. *Malaria journal*. 2018;17(1):346. Epub 2018/10/06. doi: 10.1186/s12936-018-2495-y. PubMed PMID: 30286752; PubMed Central PMCID: PMC6172834.
6. Phru CS, Kibria MG, Thriemer K, Chowdhury MU, Jahan N, Aktaruzzaman MM, et al. Case Report: A Case of Primaquine-Induced Hemoglobinuria in Glucose-6-Phosphate Dehydrogenase-Deficient Malaria Patient in Southeastern Bangladesh. *Am J Trop Med Hyg*. 2019. doi: 10.4269/ajtmh.19-0643. PubMed PMID: 31701865.
7. Chu CS, Hwang J. Tafenoquine: a toxicity overview. *Expert Opin Drug Saf*. 2021;20(3):349-62. Epub 2020/12/12. doi: 10.1080/14740338.2021.1859476. PubMed PMID: 33306921.
8. Luzzatto L, Ally M, Notaro R. Glucose-6-Phosphate Dehydrogenase Deficiency. *Blood*. 2020. doi: 10.1182/blood.2019000944. PubMed PMID: 32702756.
9. Beutler E. Glucose-6-phosphate dehydrogenase deficiency: a historical perspective. *Blood*. 2008;111(1):16-24. doi: 10.1182/blood-2007-04-077412. PubMed PMID: 18156501.
10. Alam M, Kibria M, Jahan N, Price R, Ley B. Spectrophotometry assays to determine G6PD activity from Trinity Biotech and Pointe Scientific G6PD show good correlation. *BMC Research Notes*. 2018;11(1):1-4.
11. Pfeffer D, Ley B, Howes R, Adu P, Alam M, Bansil P, et al. Quantification of glucose-6-phosphate dehydrogenase activity by spectrophotometry: A systematic review and meta-analysis. *PLoS Medicine*. 2020;17(5):1003084--1.
12. Domingo GJ, Satyagraha AW, Anvikar A, Baird K, Bancone G, Bansil P, et al. G6PD testing in support of treatment and elimination of malaria: recommendations for evaluation of G6PD tests. *Malar J*. 2013;12:391. Epub 2013/11/06. doi: 10.1186/1475-2875-12-391. PubMed PMID: 24188096; PubMed Central PMCID: PMC3830439.
13. Gomez-Manzo S, Marcial-Quino J, Vanoye-Carlo A, Serrano-Posada H, Ortega-Cuellar D, Gonzalez-Valdez A, et al. Glucose-6-Phosphate Dehydrogenase: Update and Analysis of New Mutations around the World. *Int J Mol Sci*. 2016;17(12). Epub 20161209. doi: 10.3390/ijms17122069. PubMed PMID: 27941691; PubMed Central PMCID: PMC65187869.
14. Nannelli C, Bosman A., Cunningham J., Dugue A.P., Luzzatto L. Genetics variants causing G6PD deficiency: biochemical and clinical data support new WHO classification. *British Journal of Haematology*. 2023;202(5):1024-32. Epub 06 July 2023.
15. Pfeffer DA, Satyagraha AW, Sadhewa A, Alam MS, Bancone G, Boum Y, et al. Genetic variants of glucose-6-phosphate dehydrogenase and their associated enzyme activity: a systematic review and meta-analysis. *Pathogens*. 2022;11(9):1045.

- 361 16. Ley B, Kibria M, Khan W, Auburn S, Phru C, Jahan N, et al. Wide range of G6PD activities  
362 found among ethnic groups of the Chittagong Hill Tracts, Bangladesh. *PLOS Neglected Tropical*  
363 *Diseases*. 2020;14(9):8697--1.
- 364 17. WHO. WHO Guidelines for malaria, 14 March 2023. In: Organization WH, editor. Geneva,  
365 Switzerland2023.
- 366 18. Llanos-Cuentas A, Lacerda MVG, Hien TT, Velez ID, Namaik-Larp C, Chu CS, et al. Tafenoquine  
367 versus Primaquine to Prevent Relapse of Plasmodium vivax Malaria. *N Engl J Med*. 2019;380(3):229-  
368 41. Epub 2019/01/17. doi: 10.1056/NEJMoa1802537. PubMed PMID: 30650326.
- 369 19. Lacerda MVG, Llanos-Cuentas A, Krudsood S, Lon C, Saunders DL, Mohammed R, et al.  
370 Single-Dose Tafenoquine to Prevent Relapse of Plasmodium vivax Malaria. *N Engl J Med*.  
371 2019;380(3):215-28. Epub 2019/01/17. doi: 10.1056/NEJMoa1710775. PubMed PMID: 30650322;  
372 PubMed Central PMCID: PMC6657226.
- 373 20. WHO Global Malaria Programme Malaria Policy Advisory Group. Meeting report of the  
374 technical consultation to review the classification of glucose-6-phosphate dehydrogenase (G6PD).  
375 Geneva, Switzerland: 2022 WHO/UCN/GMP/MPAG/2022.01.
- 376 21. Pfeffer DA, Satyagraha AW, Sadhewa A, Alam MS, Bancone G, Boum Y, et al. Genetic Variants  
377 of Glucose-6-Phosphate Dehydrogenase and Their Associated Enzyme Activity: A Systematic Review  
378 and Meta-Analysis. *Pathogens*. 2022;11(9). doi: 10.3390/pathogens11091045.
- 379 22. Sadhewa A, Cassidy-Seyoum S, Acharya S, Devine A, Price RN, Mwaura M, et al. A Review of  
380 the Current Status of G6PD Deficiency Testing to Guide Radical Cure Treatment for Vivax Malaria.  
381 *Pathogens*. 2023;12(5):650. PubMed PMID: doi:10.3390/pathogens12050650.
- 382 23. Adhikari B, Tripura R, Dysoley L, Peto TJ, Callery JJ, Heng C, et al. Glucose-6-Phosphate  
383 Dehydrogenase (G6PD) Measurement Using Biosensors by Community-Based Village Malaria  
384 Workers and Hospital Laboratory Staff in Cambodia: A Quantitative Study. *Pathogens*. 2023;12(3).  
385 Epub 2023/03/30. doi: 10.3390/pathogens12030400. PubMed PMID: 36986323; PubMed Central  
386 PMCID: PMC6657226.
- 387 24. Ley B, Winasti Satyagraha A, Kibria MG, Armstrong J, Bancone G, Bei AK, et al. Repeatability  
388 and reproducibility of a handheld quantitative G6PD diagnostic. *PLoS Negl Trop Dis*.  
389 2022;16(2):e0010174. Epub 2022/02/18. doi: 10.1371/journal.pntd.0010174. PubMed PMID:  
390 35176015; PubMed Central PMCID: PMC6657226.
- 391 25. Martínez JC, Vélez-Marín V, Lopez-Perez M, Patiño-Lugo DF, Florez ID. Diagnostic accuracy of  
392 the point-of-care standard G6PD test™ (SD Biosensor) for glucose-6-phosphate dehydrogenase  
393 deficiency: a systematic review and meta-analysis. *Malar J*. 2024;23(1):327. Epub 20241102. doi:  
394 10.1186/s12936-024-05144-1. PubMed PMID: 39488711; PubMed Central PMCID:  
395 PMC6657226.
- 396 26. Adissu W, Brito M, Garbin E, Macedo M, Monteiro W, Mukherjee SK, et al. Clinical  
397 performance validation of the STANDARD G6PD test: A multi-country pooled analysis. *PLoS Negl Trop*  
398 *Dis*. 2023;17(10):e0011652. Epub 2023/10/12. doi: 10.1371/journal.pntd.0011652. PubMed PMID:  
399 37824592; PubMed Central PMCID: PMC6657226.
- 400 27. Adhikari B, Tripura R, Dysoley L, Peto TJ, Callery JJ, Heng C, et al. Glucose-6-phosphate  
401 dehydrogenase (G6PD) measurement using biosensors by community-based village malaria workers  
402 and hospital laboratory staff in Cambodia: a quantitative study. *Pathogens*. 2023;12(3):400.
- 403 28. Whiting PF, Rutjes AW, Westwood ME, Mallett S, Deeks JJ, Reitsma JB, et al. QUADAS-2: a  
404 revised tool for the quality assessment of diagnostic accuracy studies. *Annals of internal medicine*.  
405 2011;155(8):529-36. Epub 2011/10/19. doi: 10.1059/0003-4819-155-8-201110180-00009. PubMed  
406 PMID: 22007046.
- 407 29. Zobrist S, Brito M, Garbin E, Monteiro WM, Clementino Freitas S, Macedo M, et al.  
408 Evaluation of a point-of-care diagnostic to identify glucose-6-phosphate dehydrogenase deficiency in  
409 Brazil. *PLoS Negl Trop Dis*. 2021;15(8):e0009649. doi: 10.1371/journal.pntd.0009649. PubMed PMID:  
410 34383774; PubMed Central PMCID: PMC6657226.

- 411 30. Pal S, Myburgh J, Bansil P, Hann A, Robertson L, Gerth-Guyette E, et al. Reference and point-  
412 of-care testing for G6PD deficiency: Blood disorder interference, contrived specimens, and fingerstick  
413 equivalence and precision. *PLoS One*. 2021;16(9):e0257560. doi: 10.1371/journal.pone.0257560.  
414 PubMed PMID: 34543346; PubMed Central PMCID: PMC8452025.
- 415 31. Brito-Sousa JD, Murta F, Vitor-Silva S, Sampaio V, Mendes M, Souza B, et al. Quantitative  
416 G6PD Deficiency Screening in Routine Malaria Diagnostic Units in the Brazilian Amazon (SAFEPRIM):  
417 An Operational Mixed-Methods Study. *Pathogens*. 2022;11(11):1328. PubMed PMID:  
418 doi:10.3390/pathogens11111328.
- 419 32. Adhikari B, Tripura R, Dysoley L, Callery JJ, Peto TJ, Heng C, et al. Glucose 6 Phosphate  
420 Dehydrogenase (G6PD) quantitation using biosensors at the point of first contact: a mixed method  
421 study in Cambodia. *Malaria Journal*. 2022;21(1):282.
- 422 33. Adissu W, Brito M, Garbin E, Macedo M, Monteiro W, Mukherjee SK, et al. Clinical  
423 performance validation of the STANDARD G6PD test: A multi-country pooled analysis. *PLoS*  
424 *Neglected Tropical Diseases*. 2023;17(10):e0011652.
- 425 34. Sadhewa A, Chaudhary A, Panggalo LV, Rumaseb A, Adhikari N, Adhikari S, et al. Field  
426 assessment of the operating procedures of a semi-quantitative G6PD Biosensor to improve  
427 repeatability of routine testing. *Plos one*. 2024;19(1):e0296708.
- 428 35. Ley B, Satyagraha AW, Kibria MG, Armstrong J, Bizij G, Bancone G, et al. The standard G6PD  
429 test (SD biosensor) shows good repeatability and reproducibility in a multi-laboratory comparison.  
430 *American Journal of Tropical Medicine and Hygiene*. 2021;105(5S).
- 431 36. Ley B, Luter N, Espino F, Devine A, Kalnoky M, Lubell Y, et al. The challenges of introducing  
432 routine G6PD testing into radical cure: a workshop report. *Malaria journal*. 2015;14(1):377-.
- 433 37. Rajasekhar M, Simpson JA, Ley B, Edler P, Chu CS, Abreha T, et al. Primaquine dose and the  
434 risk of haemolysis in patients with uncomplicated *Plasmodium vivax* malaria: a systematic review and  
435 individual patient data meta-analysis. *Lancet Infect Dis*. 2024;24(2):184-95. Epub 20230922. doi:  
436 10.1016/s1473-3099(23)00431-0. PubMed PMID: 37748497; PubMed Central PMCID:  
437 PMC87615565.
- 438 38. Chu CS, Bancone G, Nosten F, White NJ, Luzzatto L. Primaquine-induced haemolysis in  
439 females heterozygous for G6PD deficiency. *Malar J*. 2018;17(1):101. doi: 10.1186/s12936-018-2248-y.  
440 PubMed PMID: 29499733.
- 441 39. Thriemer K, Degaga TS, Christian M, Alam MS, Rajasekhar M, Ley B, et al. Primaquine radical  
442 cure in patients with *Plasmodium falciparum* malaria in areas co-endemic for *P falciparum* and  
443 *Plasmodium vivax* (PRIMA): a multicentre, open-label, superiority randomised controlled trial. *The*  
444 *Lancet*. 2023;402(10417):2101-10.
- 445 40. Taylor W, Thriemer K, Seidlein Lv, Yuentrakul P, Assawariyathipat T, ... Short-course  
446 primaquine for the radical cure of *Plasmodium vivax* malaria: a multicentre, randomised, placebo-  
447 controlled non-inferiority trial. *The Lancet*. 2019;394(10202):929-38.
- 448 41. Yang W-C, Tai S, Hsu C-L, Fu C-M, Chou A-K, Shao P-L, et al. Reference levels for glucose-6-  
449 phosphate dehydrogenase enzyme activity in infants 7–90 days old in Taiwan. *Journal of the*  
450 *Formosan Medical Association*. 2019. doi: <https://doi.org/10.1016/j.jfma.2019.03.010>.
- 451 42. Isaac I, Mainasara A, Erhabor O, Omojuyigbe S, Dallatu M, Bilbis L, et al. Glucose-6-  
452 phosphate dehydrogenase deficiency among children attending the Emergency Paediatric Unit of  
453 Usmanu Danfodiyo University Teaching Hospital, Sokoto, Nigeria. *Int J Gen Med*. 2013;6:557-62. Epub  
454 20130709. doi: 10.2147/ijgm.S43757. PubMed PMID: 23874116; PubMed Central PMCID:  
455 PMC3711754.
- 456 43. Pukrittayakamee S, Jittamala P, Watson JA, Hanboonkunupakarn B, Leungsinsiri P,  
457 Poovorawan K, et al. Primaquine in glucose-6-phosphate dehydrogenase deficiency: an adaptive  
458 pharmacometric assessment of ascending dose regimens in healthy volunteers. *Elife*. 2024;12. Epub  
459 2024/02/06. doi: 10.7554/eLife.87318. PubMed PMID: 38319064; PubMed Central PMCID:  
460 PMC810945527.

- 461 44. Howes RE, Piel FB, Patil AP, Nyangiri OA, Gething PW, Dewi M, et al. G6PD deficiency  
462 prevalence and estimates of affected populations in malaria endemic countries: a geostatistical  
463 model-based map. *PLoS medicine*. 2012;9(11):e1001339.
- 464 45. Alam M, Kibria M, Jahan N, Thriemer K, Hossain M, Douglas N, et al. Field evaluation of  
465 quantitative point of care diagnostics to measure glucose-6-phosphate dehydrogenase activity. *PloS*  
466 *one*. 2018;13(11):206331--1.
- 467 46. Kahn M, Ward WH, LaRue N, Kalnoky M, Pal S, Domingo GJ. Maintaining Specimen Integrity  
468 for G6PD Screening by Cytofluorometric Assays. *J Histochem Cytochem*. 2015;63(6):454-8. doi:  
469 10.1369/0022155415580594. PubMed PMID: 25786434; PubMed Central PMCID: PMC4442822.
- 470 47. Ley B, Bancone G, Seidlein LV, Thriemer K, Richards J, Domingo G, et al. Methods for the field  
471 evaluation of quantitative G6PD diagnostics: a review. *Malaria journal*. 2017;16(1):1-9.
- 472 48. Ley B, Alam MS, Kibria MG, Marfurt J, Phru CS, Ami JQ, et al. Glucose-6-phosphate  
473 dehydrogenase activity in individuals with and without malaria: Analysis of clinical trial, cross-  
474 sectional and case-control data from Bangladesh. *PLOS Medicine*. 2021;18(4):e1003576. doi:  
475 10.1371/journal.pmed.1003576.

476

477 **Figure 2. Flow diagram of patient inclusion**

478

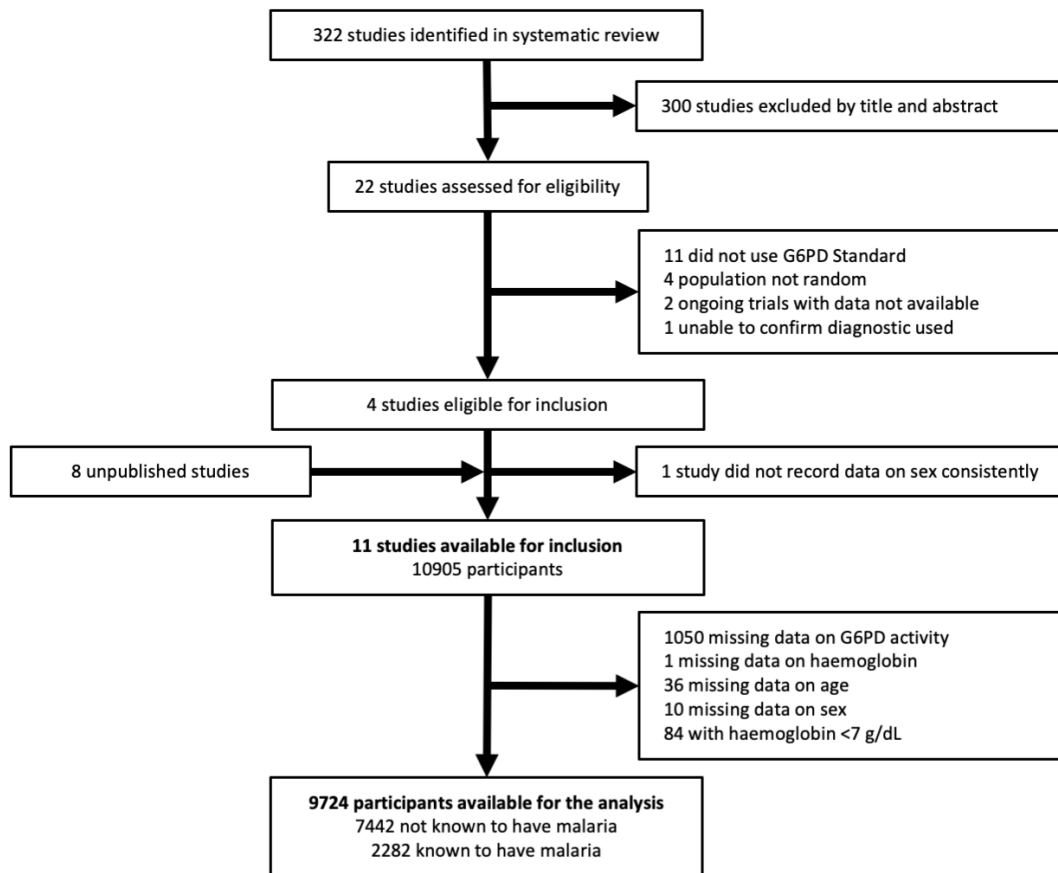

479

480 **Table 1. Demographics and baseline measures by setting**

| Country    | Study                 | Participants | Age              | Sex           |               | Malaria present |                | Blood sampling method |                | Haemoglobin (g/dL) |
|------------|-----------------------|--------------|------------------|---------------|---------------|-----------------|----------------|-----------------------|----------------|--------------------|
|            |                       |              |                  | Male          | Female        | No or unknown   | Yes            | Venous                | Capillary      |                    |
| Overall    |                       | 9,724        | 30.0 (21.0-43.0) | 5,487 (56.4%) | 4,237 (43.6%) | 7,442 (76.5%)   | 2,282 (23.5%)  | 786 (8.1%)            | 8,938 (91.9%)  | 13.5 (12.0-15.0)   |
| Bangladesh | ACROSS 2019 [33]      | 468          | 35.0 (15.0-45.0) | 269 (57.5%)   | 199 (42.5%)   | 468 (100.0%)    | 0 (0.0%)       | 468 (100.0%)          | 0 (0.0%)       | 14.4 (13.0-15.8)   |
| Brazil     | Brito-Sousa 2022 [31] | 1,097        | 23.0 (12.0-39.0) | 674 (61.4%)   | 423 (38.6%)   | 0 (0.0%)        | 1,097 (100.0%) | 0 (0.0%)              | 1,097 (100.0%) | 12.9 (11.3-14.4)   |
|            | PATH 2019 [33]        | 1,730        | 37.0 (27.0-47.0) | 785 (45.4%)   | 945 (54.6%)   | 1,480 (85.5%)   | 250 (14.5%)    | 8 (0.5%)              | 1,722 (99.5%)  | 13.2 (12.0-14.5)   |
| Cambodia   | Adhikari 2022 [32]    | 1,327        | 31.0 (23.0-42.0) | 993 (74.8%)   | 334 (25.2%)   | 1,259 (94.9%)   | 68 (5.1%)      | 0 (0.0%)              | 1,327 (100.0%) | 14.0 (12.4-15.7)   |
|            | EFFORT 2023           | 282          | 26.0 (21.0-35.0) | 251 (89.0%)   | 31 (11.0%)    | 5 (1.8%)        | 277 (98.2%)    | 0 (0.0%)              | 282 (100.0%)   | 14.6 (13.3-15.7)   |
| Ethiopia   | EFFORT 2023           | 373          | 23.0 (19.0-30.0) | 211 (56.6%)   | 162 (43.4%)   | 0 (0.0%)        | 373 (100.0%)   | 0 (0.0%)              | 373 (100.0%)   | 14.0 (12.5-15.5)   |
|            | PATH 2019 [33]        | 1,013        | 24.0 (21.0-31.0) | 538 (53.1%)   | 475 (46.9%)   | 1,013 (100.0%)  | 0 (0.0%)       | 0 (0.0%)              | 1,013 (100.0%) | 14.6 (13.2-16.2)   |
| Indonesia  | ACROSS 2018           | 752          | 31.0 (11.0-47.5) | 310 (41.2%)   | 442 (58.8%)   | 743 (98.8%)     | 9 (1.2%)       | 0 (0.0%)              | 752 (100.0%)   | 13.5 (12.4-14.9)   |
|            | EFFORT 2023           | 195          | 28.0 (19.0-40.0) | 134 (68.7%)   | 61 (31.3%)    | 6 (3.1%)        | 189 (96.9%)    | 0 (0.0%)              | 195 (100.0%)   | 14.1 (12.6-15.4)   |
|            | Sadhewa 2024 [34]     | 59           | 35.0 (29.0-42.0) | 14 (23.7%)    | 45 (76.3%)    | 59 (100.0%)     | 0 (0.0%)       | 0 (0.0%)              | 59 (100.0%)    | 16.0 (14.6-17.1)   |
| India      | ACROSS 2020 [33]      | 778          | 33.0 (20.0-47.0) | 359 (46.1%)   | 419 (53.9%)   | 759 (97.6%)     | 19 (2.4%)      | 250 (32.1%)           | 528 (67.9%)    | 13.2 (11.7-14.8)   |
|            | PATH 2020 [33]        | 909          | 35.0 (23.0-50.0) | 585 (64.4%)   | 324 (35.6%)   | 909 (100.0%)    | 0 (0.0%)       | 0 (0.0%)              | 909 (100.0%)   | 12.3 (10.8-13.8)   |
| Nepal      | Sadhewa 2024 [34]     | 120          | 32.0 (21.0-50.0) | 51 (42.5%)    | 69 (57.5%)    | 120 (100.0%)    | 0 (0.0%)       | 60 (50.0%)            | 60 (50.0%)     | 14.2 (13.1-16.2)   |
| USA        | Pal 2021 [30]         | 621          | 34.0 (26.0-48.0) | 313 (50.4%)   | 308 (49.6%)   | 621 (100.0%)    | 0 (0.0%)       | 0 (0.0%)              | 621 (100.0%)   | 12.4 (11.4-13.7)   |

481 IQR – interquartile range



482 Figure 3. Density of G6PD activity by sex

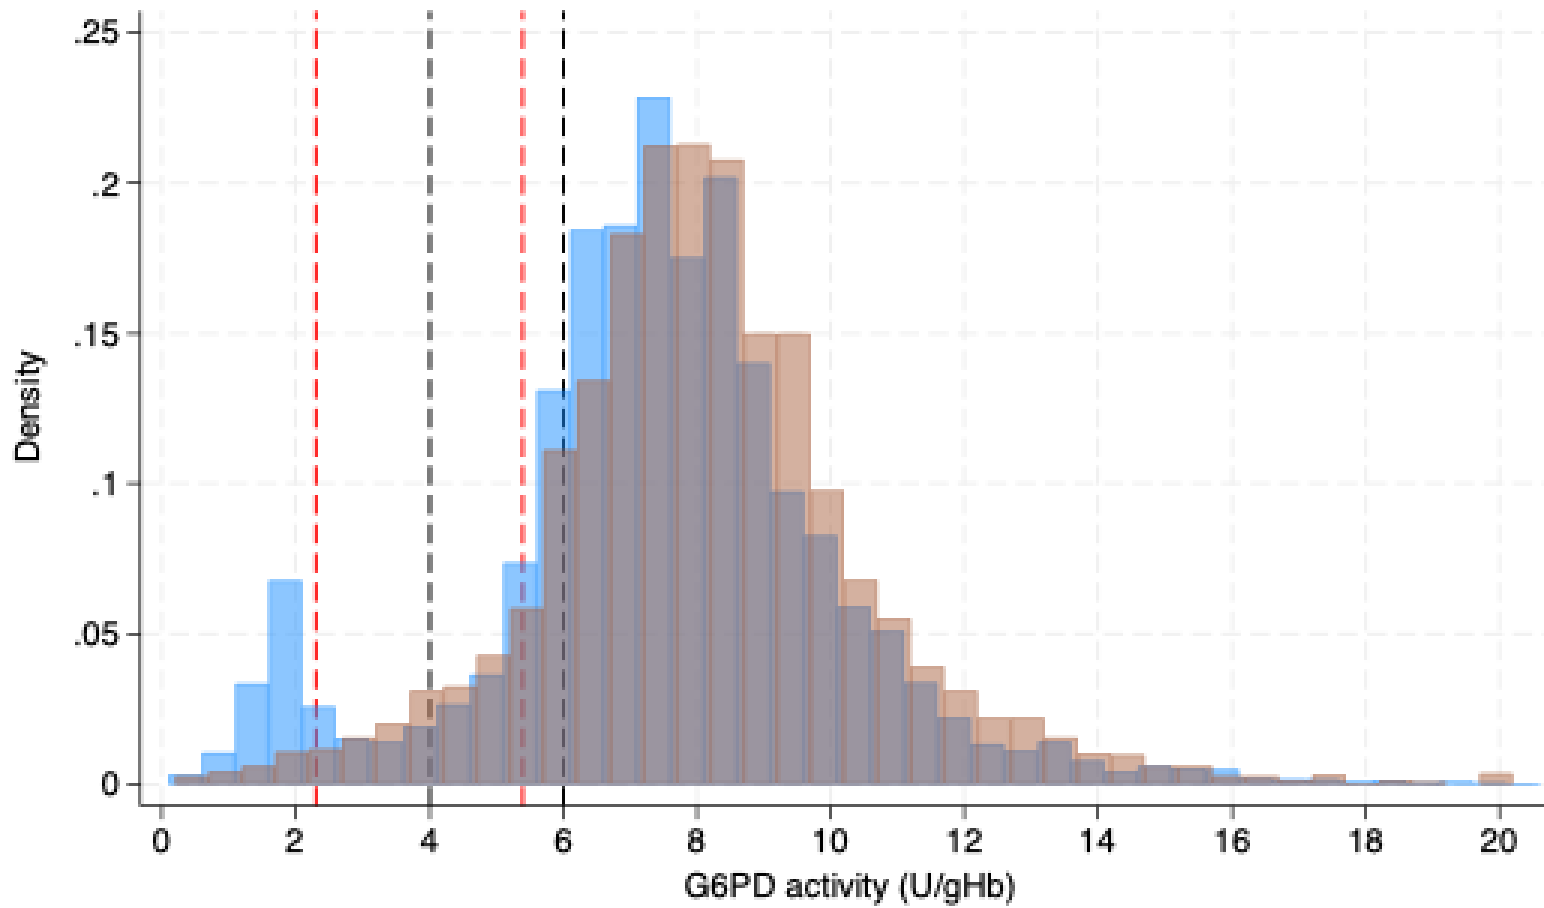

483  
484

485 Blue bars correspond to males. Orange bars correspond to females. Red dotted lines correspond to 30% and 70% activity of the universal AMM. Black dotted  
486 lines correspond to the manufacturer recommended cutoff of 4.0 U/gHb and 6.0 U/gHb.

487 **Table 2. Adjusted male medians and cutoffs by setting**

| Country    | Study                 | Participants | 100% AMM, U/gHb | 30% AMM, U/gHb | Percentage (n) identified as <30% cutoff by: |               |             | 70% AMM, U/gHb | Percentage identified as <70% cutoff by: |               |             |
|------------|-----------------------|--------------|-----------------|----------------|----------------------------------------------|---------------|-------------|----------------|------------------------------------------|---------------|-------------|
|            |                       |              |                 |                | Manufacturer (n)                             | Universal (n) | Setting (n) |                | Manufacturer (n)                         | Universal (n) | Setting (n) |
| Overall    |                       | 9,724        | 7.7             | 2.3            | 7.2% (699)                                   | 4.2% (411)    | 3.9% (301)  | 5.4            | 18.3% (1,777)                            | 11.9% (1,156) | 10.8% (830) |
| Bangladesh | ACROSS 2019 [33]      | 468          | 9.9             | 3.0            | 7.7% (36)                                    | 6.0% (28)     | 7.1% (33)   | 6.9            | 9.6% (45)                                | 8.8% (41)     | 11.5% (54)  |
| Brazil     | Brito-Sousa 2022 [31] | 1,097        | -               | -              | 5.9% (65)                                    | 2.6% (29)     | -           | -              | 19.1% (209)                              | 11.9% (130)   | -           |
|            | PATH 2019 [33]        | 1,730        | 7.5             | 2.3            | 5.5% (95)                                    | 3.3% (57)     | 3.1% (53)   | 5.3            | 15.5% (268)                              | 9.9% (171)    | 9.3% (161)  |
| Cambodia   | Adhikari 2022 [32]    | 1,327        | 6.4             | 1.9            | 21.5% (285)                                  | 13.3% (176)   | 9.9% (132)  | 4.5            | 44.1% (585)                              | 33.8% (449)   | 24.8% (329) |
|            | EFFORT 2023           | 282          | -               | -              | 11.3% (32)                                   | 10.3% (29)    | -           | -              | 33.7% (95)                               | 16.7% (47)    | -           |
| Ethiopia   | EFFORT 2023           | 373          | -               | -              | 2.1% (8)                                     | 0.3% (1)      | -           | -              | 25.2% (94)                               | 5.1% (19)     | -           |
|            | PATH 2019 [33]        | 1,013        | 7.5             | 2.3            | 1.9% (19)                                    | 0.8% (8)      | 0.8% (8)    | 5.3            | 7.9% (80)                                | 3.7% (37)     | 3.7% (37)   |
| Indonesia  | ACROSS 2018           | 752          | 8.6             | 2.6            | 2.0% (15)                                    | 0.9% (7)      | 0.9% (7)    | 6.0            | 3.9% (29)                                | 2.3% (17)     | 3.9% (29)   |
|            | EFFORT 2023           | 195          | -               | -              | 4.6% (9)                                     | 2.1% (4)      | -           | -              | 30.8% (60)                               | 9.2% (18)     | -           |
|            | Sadhewa 2024 [34]     | 59           | -               | -              | 1.7% (1)                                     | 1.7% (1)      | -           | -              | 28.8% (17)                               | 8.5% (5)      | -           |
| India      | ACROSS 2020 [33]      | 778          | 8.3             | 2.5            | 2.3% (18)                                    | 1.3% (10)     | 1.3% (10)   | 5.8            | 7.1% (55)                                | 4.9% (38)     | 6.6% (51)   |
|            | PATH 2020 [33]        | 909          | 8.3             | 2.5            | 5.1% (46)                                    | 2.9% (26)     | 2.9% (26)   | 5.8            | 8.6% (78)                                | 6.7% (61)     | 7.9% (72)   |
| Nepal      | Sadhewa 2024 [34]     | 120          | 6.2             | 1.9            | 7.5% (9)                                     | 1.7% (2)      | 0.8% (1)    | 4.3            | 34.2% (41)                               | 25.8% (31)    | 10.0% (12)  |
| USA        | Pal 2021 [30]         | 621          | 7.3             | 2.2            | 9.8% (61)                                    | 5.3% (33)     | 5.0% (31)   | 5.1            | 19.5% (121)                              | 14.8% (92)    | 13.7% (85)  |

488 AMM – adjusted male median; An AMM was not calculated for Sadhewa et al in Indonesia [34] due to too few male participants. An AMM was not  
489 calculated for EFFORT in Cambodia, Ethiopia and Indonesia, and Brito-Sousa et al in Brazil [31] as included participants were predominantly parasitaemic.  
490

491 Figure 4. Density of G6PD activity in A) males and B) females by setting

492 A)

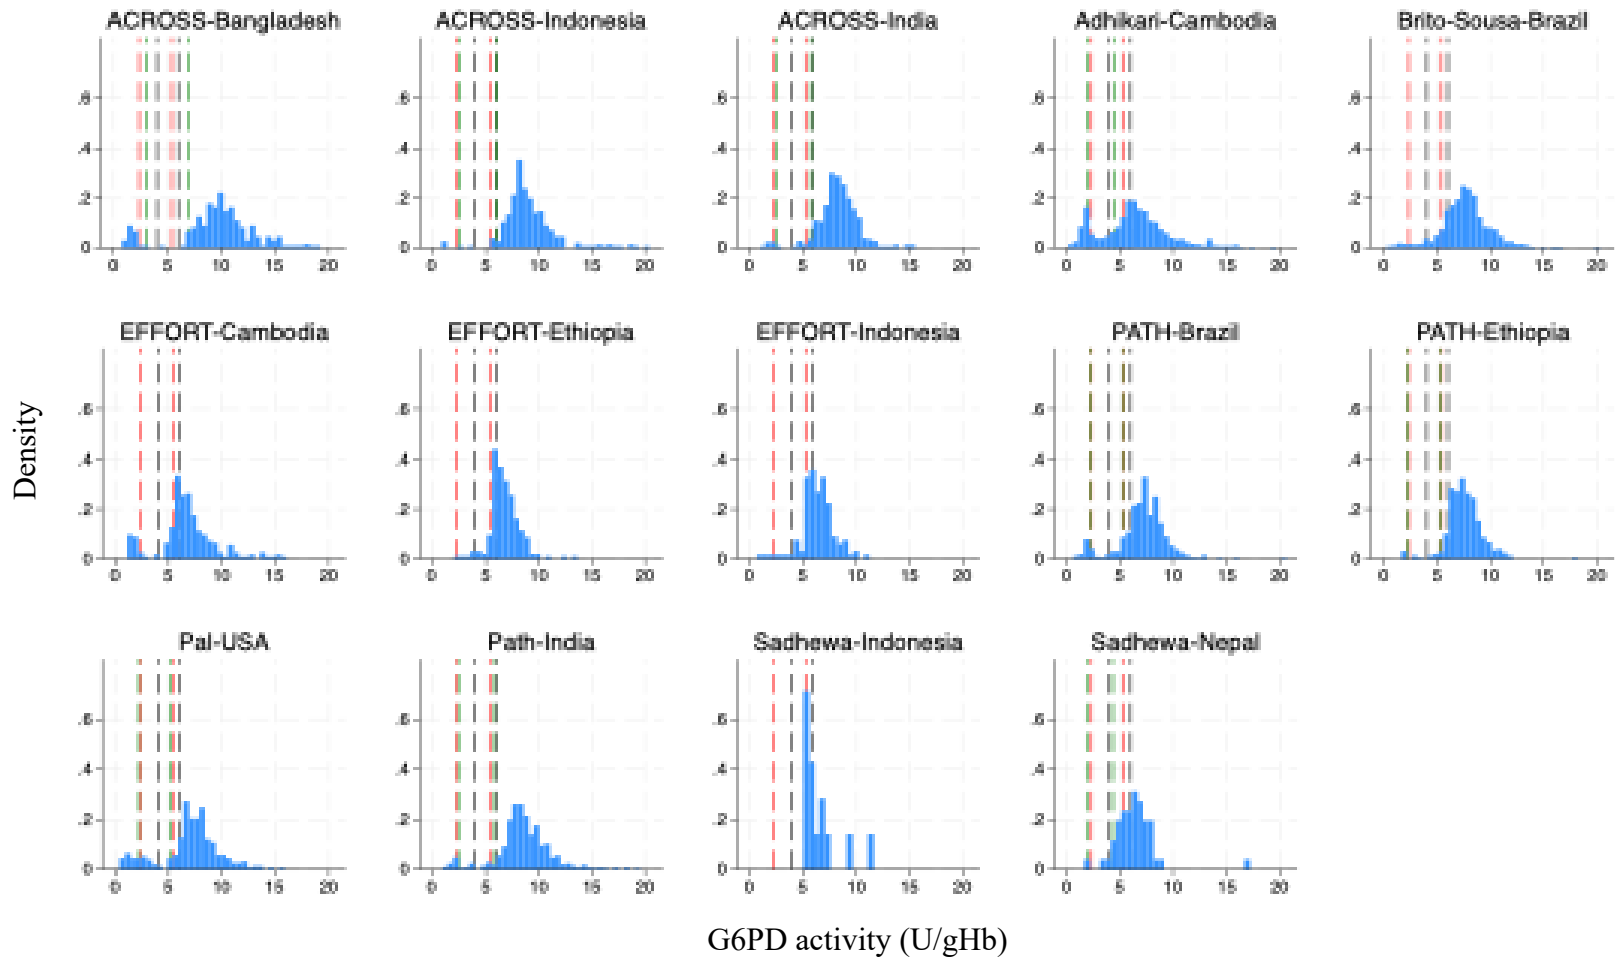

493  
494  
495  
496  
497  
498

499 B)

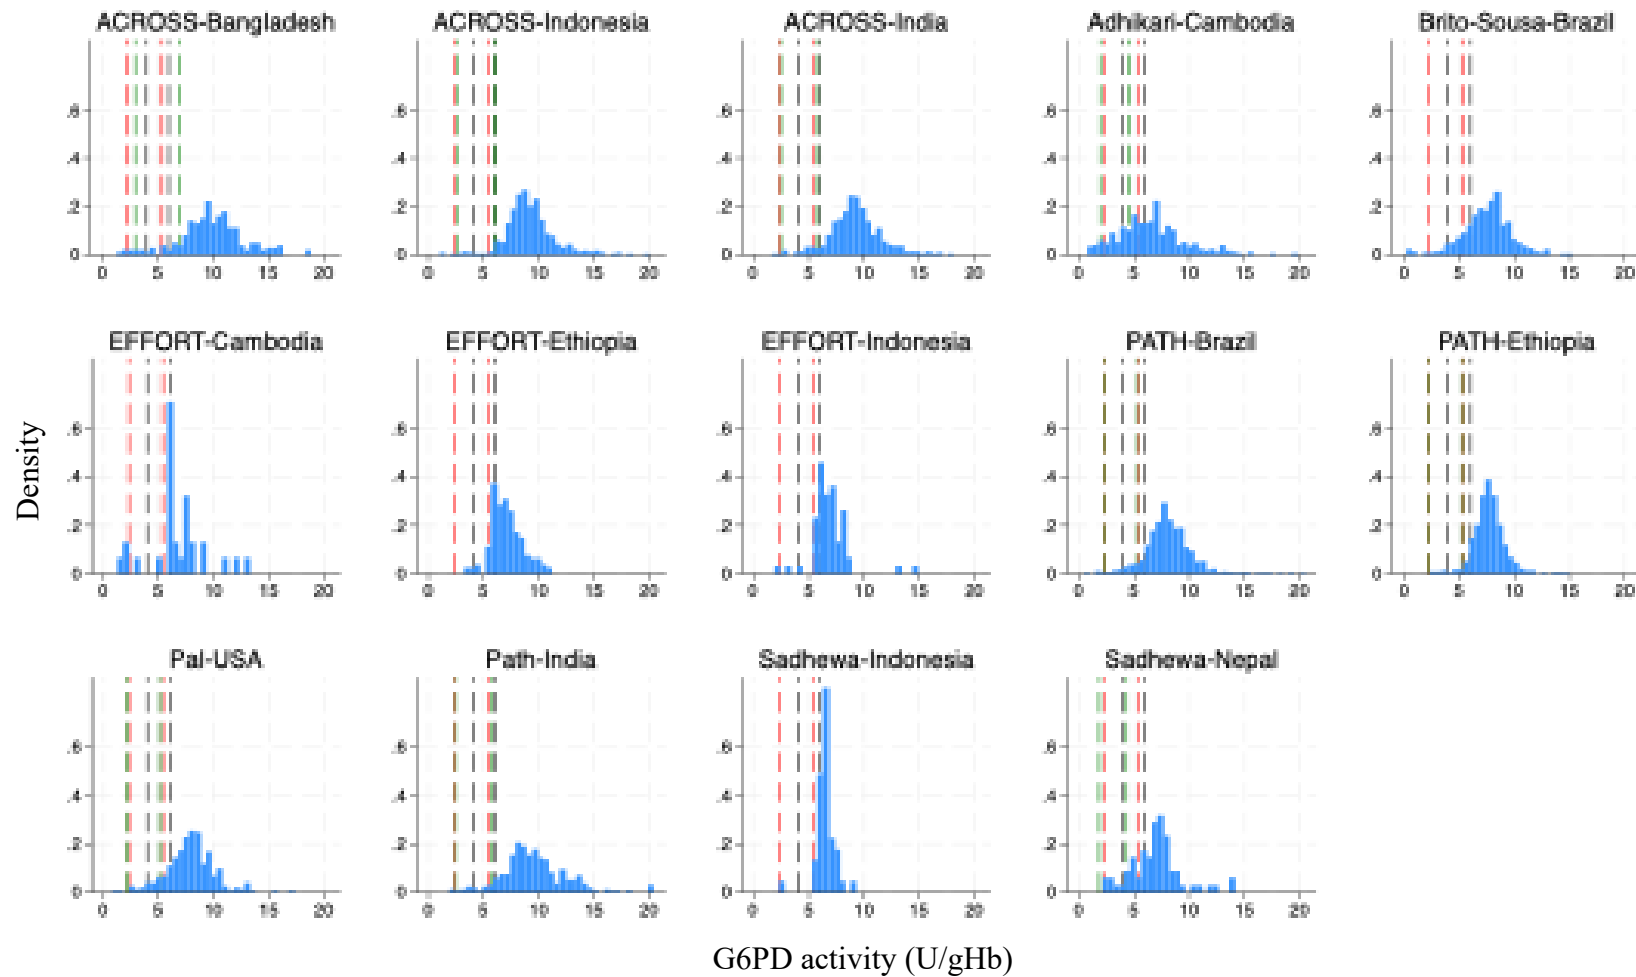

500

501

502 Red dotted lines correspond to 30% and 70% activity of the universal AMM. Black dotted lines correspond to the manufacturer recommended

503 cutoff of 4.0 U/gHb and 6.0 U/gHb. Green dotted lines correspond to 30% and 70% activity of the setting-specific AMM. Setting-specific AMMs

504 were not available for EFFORT in Cambodia, Ethiopia and Indonesia, Sadhewa et al in Indonesia [34] and Brito-Sousa et al in Brazil [31].

505 **Figure 5. Relationship between age and G6PD activity in all individuals**

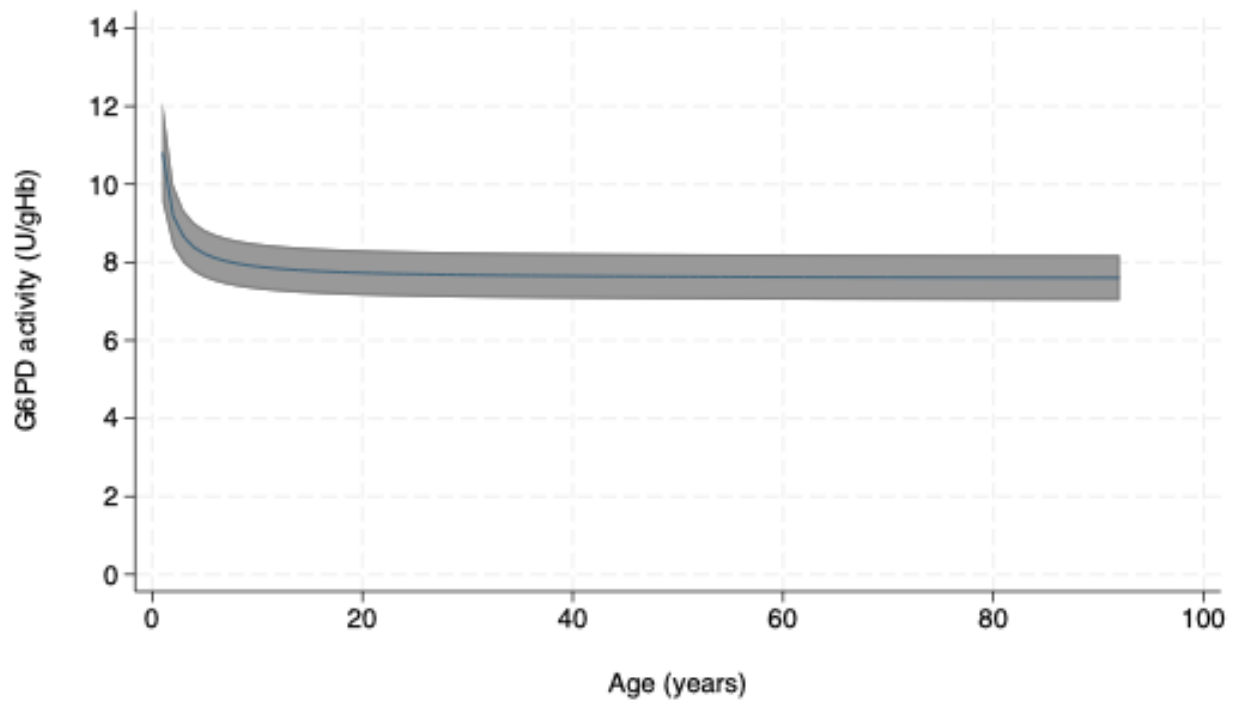

506  
507 Based on a generalised estimating equation model with fractional polynomial terms for age, adjusted for  
508 sex, haemoglobin and blood sampling method with clustering by setting after exclusion of participants with  
509 haemoglobin <7 g/dL or >20 g/dL.  
510

## Checklist S1. PRISMA-IPD Checklist of items to include when reporting a systematic review and meta-analysis of individual participant data (IPD)

| PRISMA-IPD Section/topic                                                                                                            | Item No | Checklist item                                                                                                                                                                                                                                                                                                                                                                                                                                                                                                          | Reported on page |
|-------------------------------------------------------------------------------------------------------------------------------------|---------|-------------------------------------------------------------------------------------------------------------------------------------------------------------------------------------------------------------------------------------------------------------------------------------------------------------------------------------------------------------------------------------------------------------------------------------------------------------------------------------------------------------------------|------------------|
| <b>Title</b>                                                                                                                        |         |                                                                                                                                                                                                                                                                                                                                                                                                                                                                                                                         |                  |
| Title                                                                                                                               | 1       | Identify the report as a systematic review and meta-analysis of individual participant data.                                                                                                                                                                                                                                                                                                                                                                                                                            | 1                |
| <b>Abstract</b>                                                                                                                     |         |                                                                                                                                                                                                                                                                                                                                                                                                                                                                                                                         |                  |
| Structured summary                                                                                                                  | 2       | Provide a structured summary including as applicable:                                                                                                                                                                                                                                                                                                                                                                                                                                                                   | 2                |
|                                                                                                                                     |         | <b>Background:</b> state research question and main objectives, with information on participants, interventions, comparators and outcomes.                                                                                                                                                                                                                                                                                                                                                                              |                  |
|                                                                                                                                     |         | <b>Methods:</b> report eligibility criteria; data sources including dates of last bibliographic search or elicitation, noting that IPD were sought; methods of assessing risk of bias.                                                                                                                                                                                                                                                                                                                                  |                  |
|                                                                                                                                     |         | <b>Results:</b> provide number and type of studies and participants identified and number (%) obtained; summary effect estimates for main outcomes (benefits and harms) with confidence intervals and measures of statistical heterogeneity. Describe the direction and size of summary effects in terms meaningful to those who would put findings into practice.                                                                                                                                                      |                  |
|                                                                                                                                     |         | <b>Discussion:</b> state main strengths and limitations of the evidence, general interpretation of the results and any important implications.                                                                                                                                                                                                                                                                                                                                                                          |                  |
| <b>Other:</b> report primary funding source, registration number and registry name for the systematic review and IPD meta-analysis. |         |                                                                                                                                                                                                                                                                                                                                                                                                                                                                                                                         |                  |
| <b>Introduction</b>                                                                                                                 |         |                                                                                                                                                                                                                                                                                                                                                                                                                                                                                                                         |                  |
| Rationale                                                                                                                           | 3       | Describe the rationale for the review in the context of what is already known.                                                                                                                                                                                                                                                                                                                                                                                                                                          | 3-4              |
| Objectives                                                                                                                          | 4       | Provide an explicit statement of the questions being addressed with reference, as applicable, to participants, interventions, comparisons, outcomes and study design (PICOS). Include any hypotheses that relate to particular types of participant-level subgroups.                                                                                                                                                                                                                                                    | 4                |
| <b>Methods</b>                                                                                                                      |         |                                                                                                                                                                                                                                                                                                                                                                                                                                                                                                                         |                  |
| Protocol and registration                                                                                                           | 5       | Indicate if a protocol exists and where it can be accessed. If available, provide registration information including registration number and registry name. Provide publication details, if applicable.                                                                                                                                                                                                                                                                                                                 | 5                |
| Eligibility criteria                                                                                                                | 6       | Specify inclusion and exclusion criteria including those relating to participants, interventions, comparisons, outcomes, study design and characteristics (e.g. years when conducted, required minimum follow-up). Note whether these were applied at the study or individual level i.e. whether eligible participants were included (and ineligible participants excluded) from a study that included a wider population than specified by the review inclusion criteria. The rationale for criteria should be stated. | 5                |
| Identifying studies -                                                                                                               | 7       | Describe all methods of identifying published and unpublished studies including, as applicable: which bibliographic databases were searched with dates of coverage; details of any hand searching including of conference proceedings; use of study registers                                                                                                                                                                                                                                                           | 5                |

|                                                |    |                                                                                                                                                                                                                                                                                                                                                                                                                                                                                                                                                                                                                                                                                                                                                                                                                                                                                                                                                 |   |
|------------------------------------------------|----|-------------------------------------------------------------------------------------------------------------------------------------------------------------------------------------------------------------------------------------------------------------------------------------------------------------------------------------------------------------------------------------------------------------------------------------------------------------------------------------------------------------------------------------------------------------------------------------------------------------------------------------------------------------------------------------------------------------------------------------------------------------------------------------------------------------------------------------------------------------------------------------------------------------------------------------------------|---|
| information sources                            |    | and agency or company databases; contact with the original research team and experts in the field; open adverts and surveys. Give the date of last search or elicitation.                                                                                                                                                                                                                                                                                                                                                                                                                                                                                                                                                                                                                                                                                                                                                                       |   |
| Identifying studies - search                   | 8  | Present the full electronic search strategy for at least one database, including any limits used, such that it could be repeated.                                                                                                                                                                                                                                                                                                                                                                                                                                                                                                                                                                                                                                                                                                                                                                                                               | 5 |
| Study selection processes                      | 9  | State the process for determining which studies were eligible for inclusion.                                                                                                                                                                                                                                                                                                                                                                                                                                                                                                                                                                                                                                                                                                                                                                                                                                                                    | 5 |
| Data collection processes                      | 10 | Describe how IPD were requested, collected and managed, including any processes for querying and confirming data with investigators. If IPD were not sought from any eligible study, the reason for this should be stated (for each such study).<br>If applicable, describe how any studies for which IPD were not available were dealt with. This should include whether, how and what aggregate data were sought or extracted from study reports and publications (such as extracting data independently in duplicate) and any processes for obtaining and confirming these data with investigators.                                                                                                                                                                                                                                                                                                                                          | 5 |
| Data items                                     | 11 | Describe how the information and variables to be collected were chosen. List and define all study level and participant level data that were sought, including baseline and follow-up information. If applicable, describe methods of standardising or translating variables within the IPD datasets to ensure common scales or measurements across studies.                                                                                                                                                                                                                                                                                                                                                                                                                                                                                                                                                                                    | 5 |
| IPD integrity                                  | A1 | Describe what aspects of IPD were subject to data checking (such as sequence generation, data consistency and completeness, baseline imbalance) and how this was done.                                                                                                                                                                                                                                                                                                                                                                                                                                                                                                                                                                                                                                                                                                                                                                          | 5 |
| Risk of bias assessment in individual studies. | 12 | Describe methods used to assess risk of bias in the individual studies and whether this was applied separately for each outcome. If applicable, describe how findings of IPD checking were used to inform the assessment. Report if and how risk of bias assessment was used in any data synthesis.                                                                                                                                                                                                                                                                                                                                                                                                                                                                                                                                                                                                                                             | 6 |
| Specification of outcomes and effect measures  | 13 | State all treatment comparisons of interests. State all outcomes addressed and define them in detail. State whether they were pre-specified for the review and, if applicable, whether they were primary/main or secondary/additional outcomes. Give the principal measures of effect (such as risk ratio, hazard ratio, difference in means) used for each outcome.                                                                                                                                                                                                                                                                                                                                                                                                                                                                                                                                                                            | 6 |
| Synthesis methods                              | 14 | Describe the meta-analysis methods used to synthesise IPD. Specify any statistical methods and models used. Issues should include (but are not restricted to): <ul style="list-style-type: none"> <li>• Use of a one-stage or two-stage approach.</li> <li>• How effect estimates were generated separately within each study and combined across studies (where applicable).</li> <li>• Specification of one-stage models (where applicable) including how clustering of patients within studies was accounted for.</li> <li>• Use of fixed or random effects models and any other model assumptions, such as proportional hazards.</li> <li>• How (summary) survival curves were generated (where applicable).</li> <li>• Methods for quantifying statistical heterogeneity (such as <math>I^2</math> and <math>t^2</math>).</li> <li>• How studies providing IPD and not providing IPD were analysed together (where applicable).</li> </ul> | 6 |

|                                     |    |                                                                                                                                                                                                                                                                                                                                                                                                                                                                   |             |
|-------------------------------------|----|-------------------------------------------------------------------------------------------------------------------------------------------------------------------------------------------------------------------------------------------------------------------------------------------------------------------------------------------------------------------------------------------------------------------------------------------------------------------|-------------|
|                                     |    | <ul style="list-style-type: none"> <li>How missing data within the IPD were dealt with (where applicable).</li> </ul>                                                                                                                                                                                                                                                                                                                                             |             |
| Exploration of variation in effects | A2 | If applicable, describe any methods used to explore variation in effects by study or participant level characteristics (such as estimation of interactions between effect and covariates). State all participant-level characteristics that were analysed as potential effect modifiers, and whether these were pre-specified.                                                                                                                                    | 6           |
| Risk of bias across studies         | 15 | Specify any assessment of risk of bias relating to the accumulated body of evidence, including any pertaining to not obtaining IPD for particular studies, outcomes or other variables.                                                                                                                                                                                                                                                                           | N/A         |
| Additional analyses                 | 16 | Describe methods of any additional analyses, including sensitivity analyses. State which of these were pre-specified.                                                                                                                                                                                                                                                                                                                                             | 6           |
| <b>Results</b>                      |    |                                                                                                                                                                                                                                                                                                                                                                                                                                                                   |             |
| Study selection and IPD obtained    | 17 | Give numbers of studies screened, assessed for eligibility, and included in the systematic review with reasons for exclusions at each stage. Indicate the number of studies and participants for which IPD were sought and for which IPD were obtained. For those studies where IPD were not available, give the numbers of studies and participants for which aggregate data were available. Report reasons for non-availability of IPD. Include a flow diagram. | 6, Figure 1 |
| Study characteristics               | 18 | For each study, present information on key study and participant characteristics (such as description of interventions, numbers of participants, demographic data, unavailability of outcomes, funding source, and if applicable duration of follow-up). Provide (main) citations for each study. Where applicable, also report similar study characteristics for any studies not providing IPD.                                                                  | Table 1     |
| IPD integrity                       | A3 | Report any important issues identified in checking IPD or state that there were none.                                                                                                                                                                                                                                                                                                                                                                             | Nil         |
| Risk of bias within studies         | 19 | Present data on risk of bias assessments. If applicable, describe whether data checking led to the up-weighting or down-weighting of these assessments. Consider how any potential bias impacts on the robustness of meta-analysis conclusions.                                                                                                                                                                                                                   | Table S1    |
| Results of individual studies       | 20 | For each comparison and for each main outcome (benefit or harm), for each individual study report the number of eligible participants for which data were obtained and show simple summary data for each intervention group (including, where applicable, the number of events), effect estimates and confidence intervals. These may be tabulated or included on a forest plot.                                                                                  | 7           |
| Results of syntheses                | 21 | Present summary effects for each meta-analysis undertaken, including confidence intervals and measures of statistical heterogeneity. State whether the analysis was pre-specified, and report the numbers of studies and participants and, where applicable, the number of events on which it is based.                                                                                                                                                           | 7           |
|                                     |    | When exploring variation in effects due to patient or study characteristics, present summary interaction estimates for each characteristic examined, including confidence intervals and measures of statistical heterogeneity. State whether the analysis was pre-specified. State whether any interaction is consistent across trials.                                                                                                                           |             |
|                                     |    | Provide a description of the direction and size of effect in terms meaningful to those who would put findings into practice.                                                                                                                                                                                                                                                                                                                                      |             |



|                             |    |                                                                                                                                                                                                                                                                                                                                       |      |
|-----------------------------|----|---------------------------------------------------------------------------------------------------------------------------------------------------------------------------------------------------------------------------------------------------------------------------------------------------------------------------------------|------|
| Risk of bias across studies | 22 | Present results of any assessment of risk of bias relating to the accumulated body of evidence, including any pertaining to the availability and representativeness of available studies, outcomes or other variables.                                                                                                                | N/A  |
| Additional analyses         | 23 | Give results of any additional analyses (e.g. sensitivity analyses). If applicable, this should also include any analyses that incorporate aggregate data for studies that do not have IPD. If applicable, summarise the main meta-analysis results following the inclusion or exclusion of studies for which IPD were not available. | 7-8  |
| <b>Discussion</b>           |    |                                                                                                                                                                                                                                                                                                                                       |      |
| Summary of evidence         | 24 | Summarise the main findings, including the strength of evidence for each main outcome.                                                                                                                                                                                                                                                | 8-10 |
| Strengths and limitations   | 25 | Discuss any important strengths and limitations of the evidence including the benefits of access to IPD and any limitations arising from IPD that were not available.                                                                                                                                                                 | 8-10 |
| Conclusions                 | 26 | Provide a general interpretation of the findings in the context of other evidence.                                                                                                                                                                                                                                                    | 8-10 |
| Implications                | A4 | Consider relevance to key groups (such as policy makers, service providers and service users). Consider implications for future research.                                                                                                                                                                                             | 9-10 |
| <b>Funding</b>              |    |                                                                                                                                                                                                                                                                                                                                       |      |
| Funding                     | 27 | Describe sources of funding and other support (such as supply of IPD), and the role in the systematic review of those providing such support.                                                                                                                                                                                         | 10   |

© Reproduced with permission of the PRISMA IPD Group, which encourages sharing and reuse for non-commercial purposes

1 **Table S1. QUADAS analysis**

2 **Table S2. Percentage of participants identified by cutoffs by setting after exclusion of participants with malaria**

3

| Country    | Study              | Participants | Percentage (n) identified as <30% cutoff by: |               |             | Percentage (n) identified as <70% cutoff by: |               |             |
|------------|--------------------|--------------|----------------------------------------------|---------------|-------------|----------------------------------------------|---------------|-------------|
|            |                    |              | Manufacturer (n)                             | Universal (n) | Setting (n) | Manufacturer (n)                             | Universal (n) | Setting (n) |
| Overall    |                    | N=7,442      | 7.5% (557)                                   | 4.4% (329)    | 3.8% (281)  | 16.6% (1,232)                                | 11.9% (888)   | 10.6% (782) |
| Bangladesh | ACROSS 2019 [33]   | N=468        | 7.7% (36)                                    | 6.0% (28)     | 7.1% (33)   | 9.6% (45)                                    | 8.8% (41)     | 11.5% (54)  |
| Brazil     | PATH 2019 [33]     | N=1,480      | 5.3% (79)                                    | 3.1% (46)     | 2.8% (42)   | 13.9% (206)                                  | 9.2% (136)    | 8.6% (128)  |
| Cambodia   | Adhikari 2022 [32] | N=1,259      | 21.6% (272)                                  | 13.3% (167)   | 9.8% (124)  | 44.2% (556)                                  | 34.0% (428)   | 25.0% (315) |
|            | EFFORT 2023        | N=5          | 40.0% (2)                                    | 40.0% (2)     | -           | 40.0% (2)                                    | 40.0% (2)     | -           |
| Ethiopia   | PATH 2019 [33]     | N=1,013      | 1.9% (19)                                    | 0.8% (8)      | 0.8% (8)    | 7.9% (80)                                    | 3.7% (37)     | 3.7% (37)   |
| Indonesia  | ACROSS 2018        | N=743        | 2.0% (15)                                    | 0.9% (7)      | 0.9% (7)    | 3.9% (29)                                    | 2.3% (17)     | 3.9% (29)   |
|            | EFFORT 2023        | N=6          | 0.0% (0)                                     | 0.0% (0)      | -           | 50.0% (3)                                    | 16.7% (1)     | -           |
|            | Sadhewa 2024 [34]  | N=59         | 1.7% (1)                                     | 1.7% (1)      | -           | 28.8% (17)                                   | 8.5% (5)      | -           |
| India      | ACROSS 2020 [33]   | N=759        | 2.2% (17)                                    | 1.2% (9)      | 1.2% (9)    | 7.1% (54)                                    | 4.9% (37)     | 6.6% (50)   |
|            | PATH 2020 [33]     | N=909        | 5.1% (46)                                    | 2.9% (26)     | 2.9% (26)   | 8.6% (78)                                    | 6.7% (61)     | 7.9% (72)   |
| Nepal      | Sadhewa 2024 [34]  | N=120        | 7.5% (9)                                     | 1.7% (2)      | 0.8% (1)    | 34.2% (41)                                   | 25.8% (31)    | 10.0% (12)  |
| USA        | Pal 2021 [30]      | N=621        | 9.8% (61)                                    | 5.3% (33)     | 5.0% (31)   | 19.5% (121)                                  | 14.8% (92)    | 13.7% (85)  |

4 A setting specific cutoff was not available for EFFORT in Cambodia and Indonesia and Sadhewa et al in Indonesia [34] due to too few male patients to  
 5 estimate an adjusted male median.

6

7 **Figure S1. Scatter plot of A) G6PD activity (U/gHb) versus age and B) haemoglobin (g/dL) versus age**  
8 **A)**

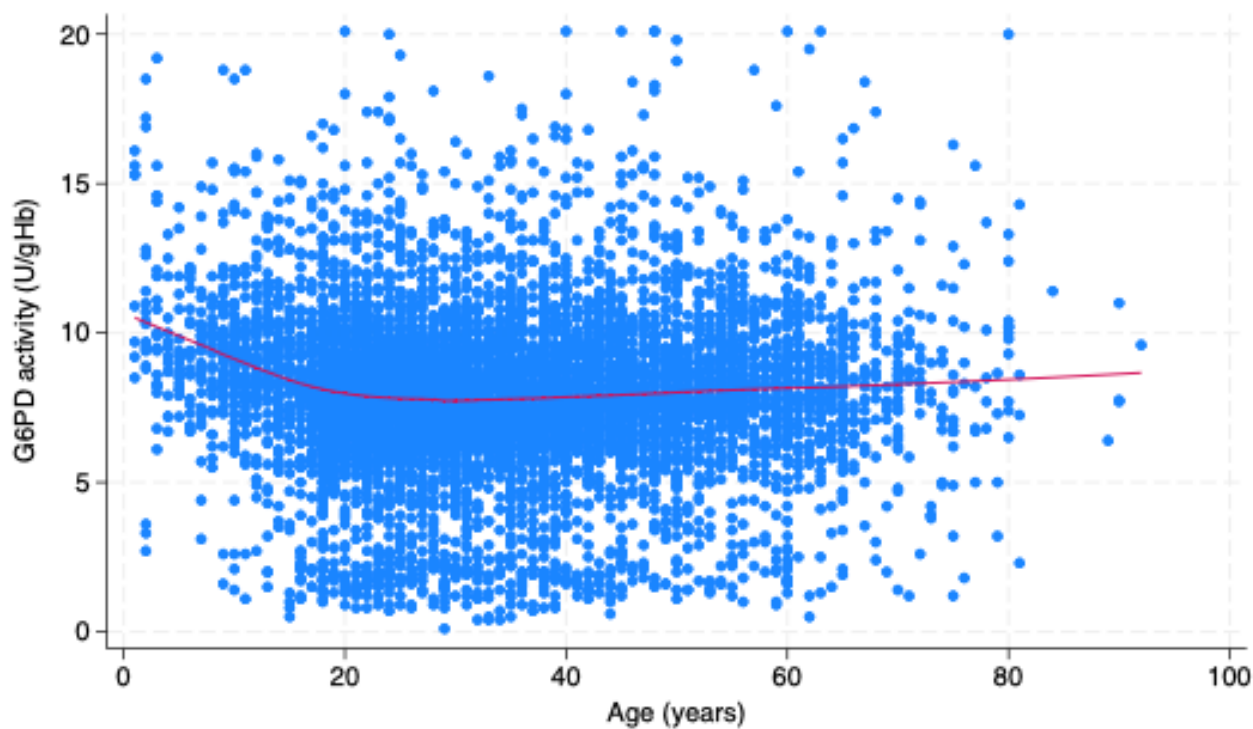

9  
10 **B)**

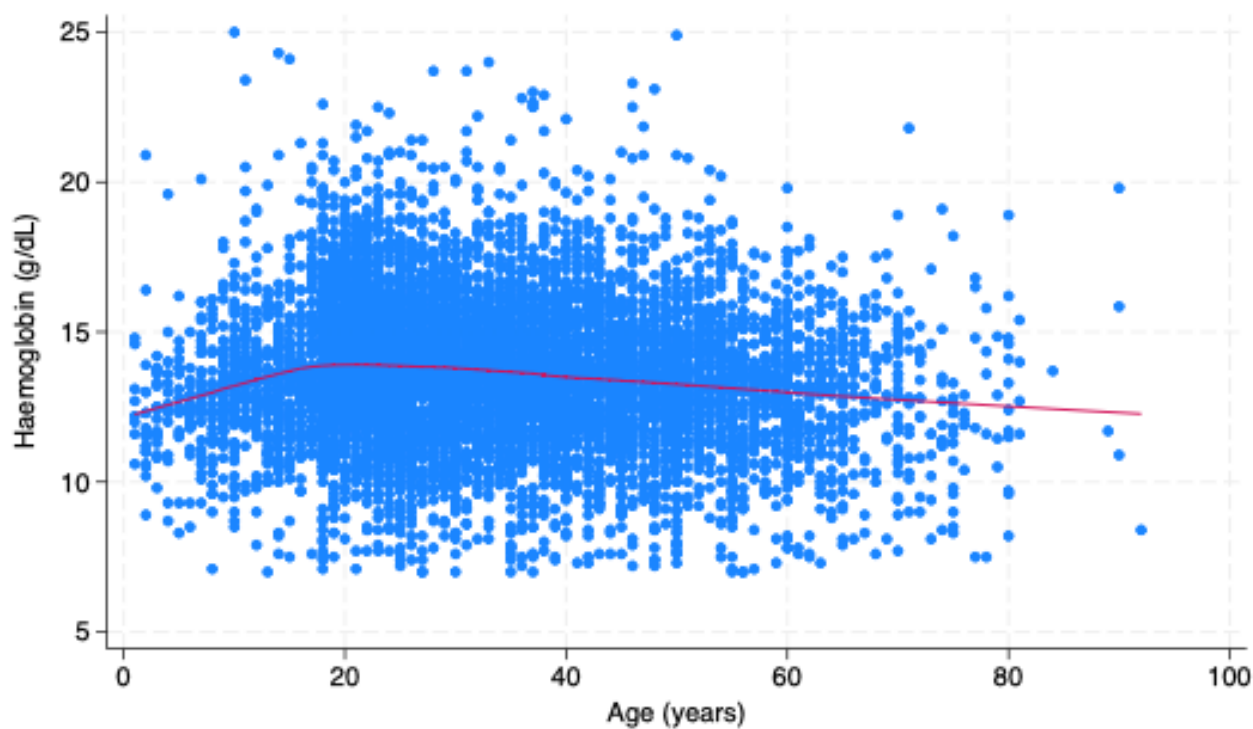

11  
12 A loess curve using Cleveland's tricube weighting function with a bandwidth of 0.8 is fitted to both figures.  
13 Red line = smoothed trend
